# Supplementary material for: Intercalation and delamination of Ti2SnC with high lithium ion storage capacity
Source: Royal Society of Chemistry journal article supplement (doi:10.1039/d0nr06260j), 2021-01-01
Supplement: d0nr06260j1.pdf [file d0nr06260j1.pdf]

## Support information

### **Intercalation and delamination of $\text{Ti}_2\text{SnC}$ with high lithium ion storage capacity**

Haijiang Wu<sup>a,b,\*</sup>, Jiale Zhu<sup>a,b,c,\*</sup>, Liang liu<sup>c</sup>, Kequan Cao<sup>c</sup>, Dan Yang<sup>c</sup>, Chen Gong<sup>a,b,c</sup>, Hao Lei<sup>c</sup>, Hongyan Hang<sup>c</sup>, Wei Yao<sup>c</sup>, Jianguang Xu<sup>c,\*</sup>

*<sup>a</sup>School of Mechanical and Energy Engineering, Shaoyang University, Shaoyang, Hunan 422000, PR China*

*<sup>b</sup>Key Laboratory of Hunan Province for Efficient Power System and Intelligent Manufacturing, Shaoyang University, Shaoyang, Hunan 422000, PR China*

*<sup>c</sup>School of Materials Science and Engineering, Yancheng Institute of Technology, Yancheng, Jiangsu 224051, PR China*

\* Corresponding author.

E-mail address: [jgxu@163.com](mailto:jgxu@163.com) (J. X)

E-mail address: [haijiang\\_wu@126.com](mailto:haijiang_wu@126.com) (H. W)

E-mail address: [18574476606@163.com](mailto:18574476606@163.com) (J. Z)

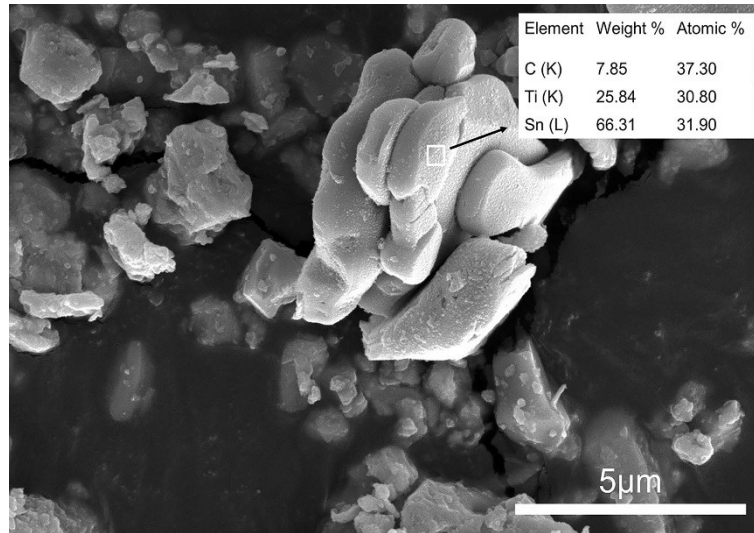

**Figure S1.** SEM image of  $\text{Ti}_2\text{SnC}$  raw material with EDS result.

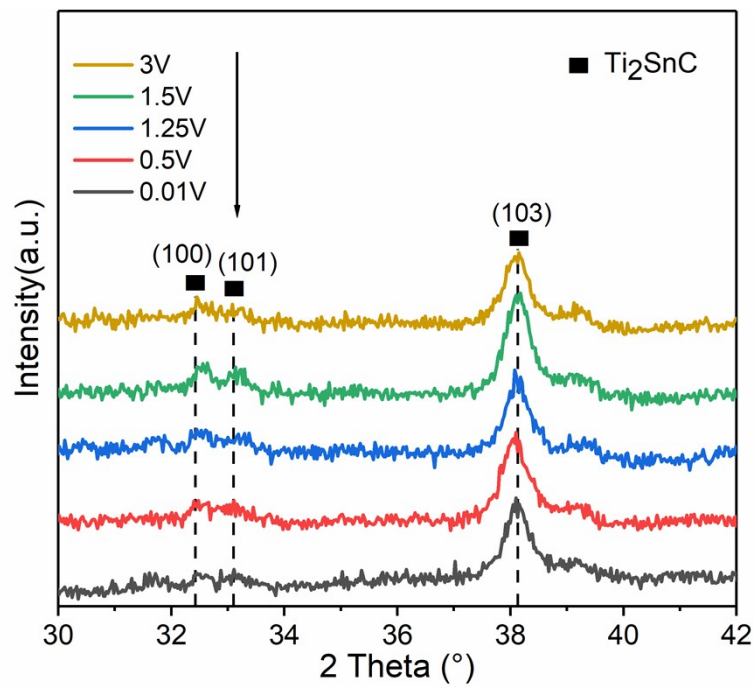

**Figure S2.** XRD patterns of n- $\text{Ti}_2\text{SnC}$  at different voltages during the second discharge cycle.

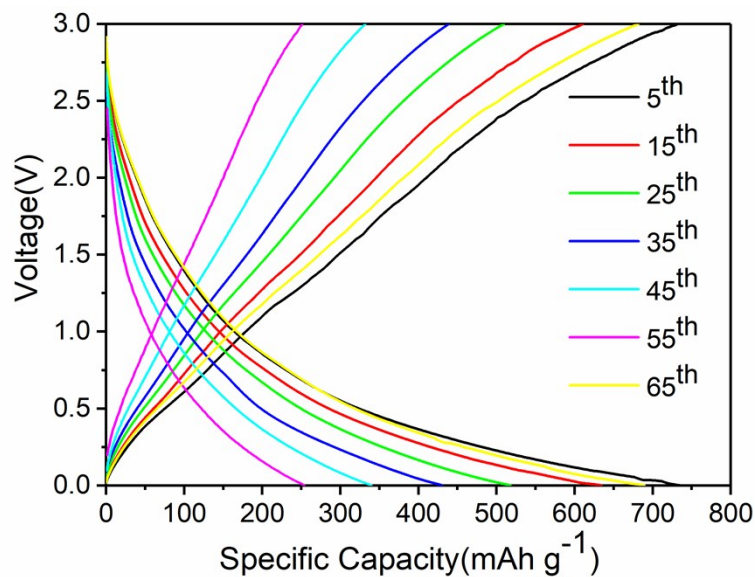

**Figure S3.** galvanostatic charge/discharge curve of n-Ti<sub>2</sub>SnC after 1000 cycles under different current densities.

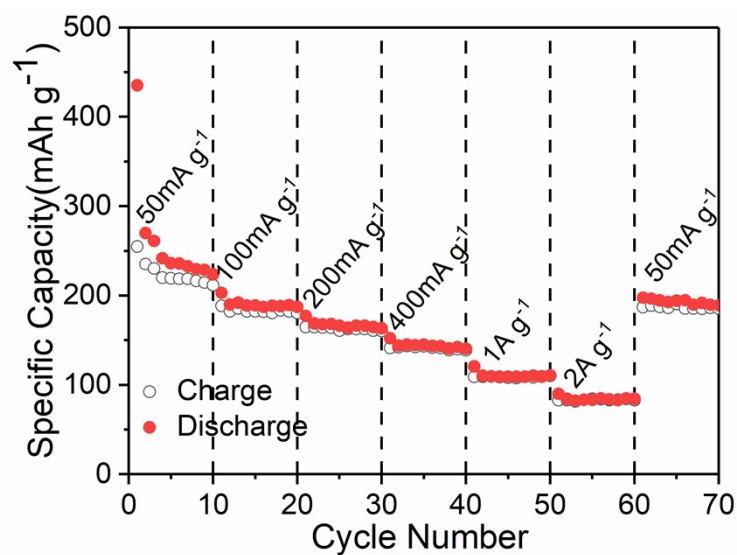

**Figure S4.** Rate performance curve of n-Ti<sub>2</sub>SnC under different current densities.

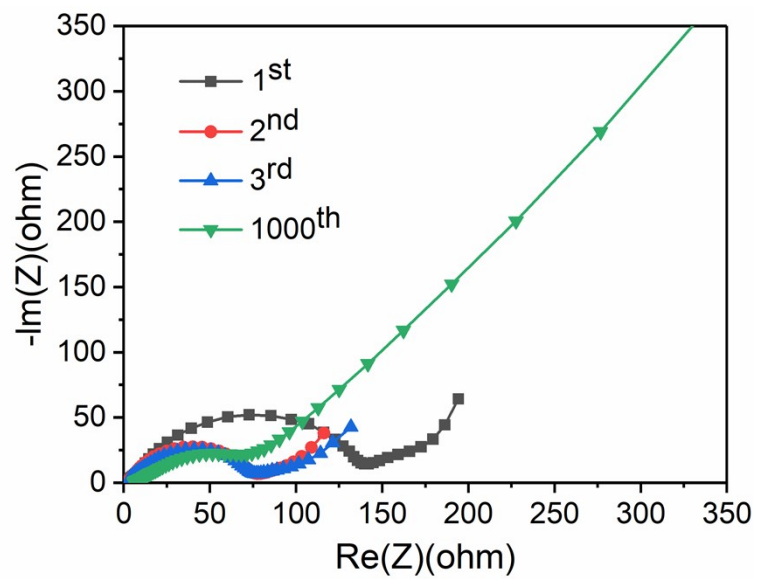

**Figure S5.** Nyquist curve of n-Ti<sub>2</sub>SnC electrode.

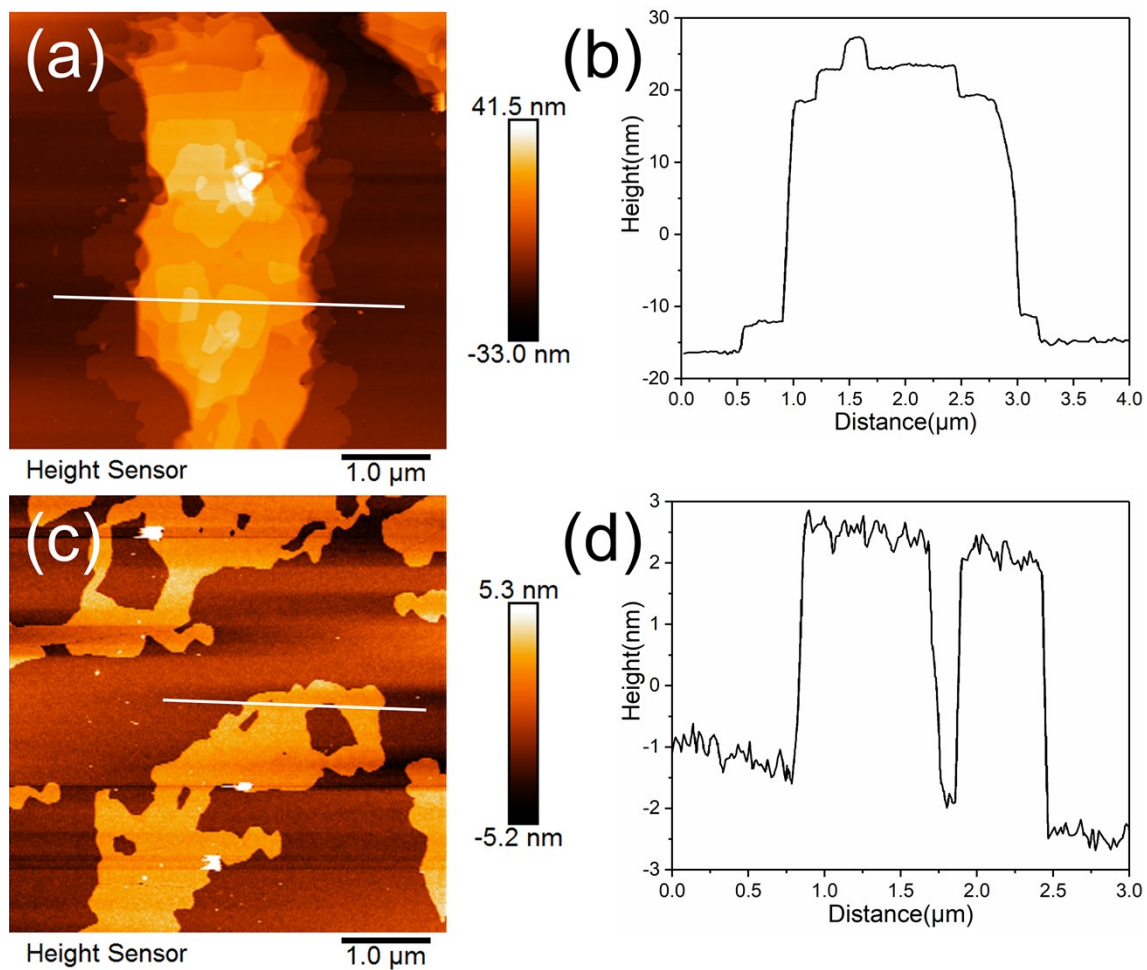

**Figure S6.** (a) AFM image of the original n-Ti<sub>2</sub>SnC. (b) the corresponding height measurement. (c) AFM image of n-Ti<sub>2</sub>SnC after 1000 charge/discharge cycles. (d) the corresponding height measurement.

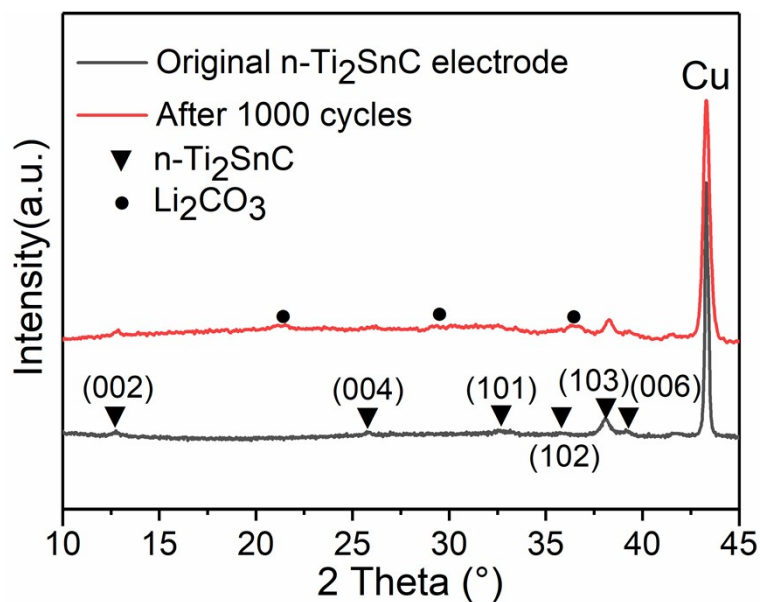

**Figure S7.** XRD of original n-Ti<sub>2</sub>SnC and that after 1000 charge/discharge cycles.

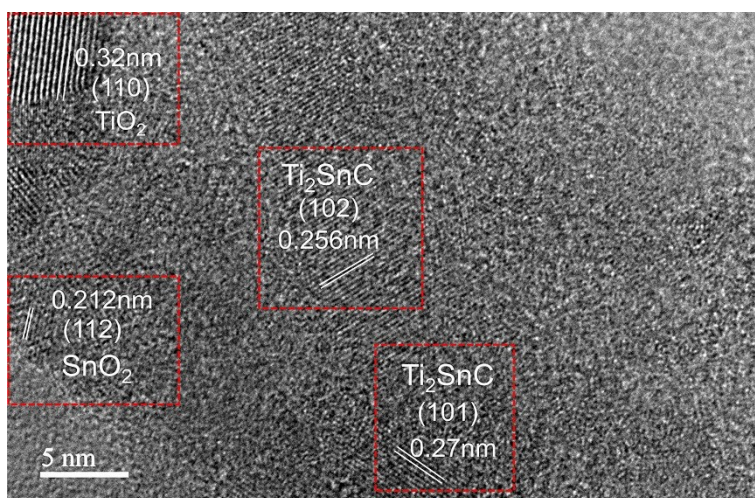

**Figure S8.** HRTEM image of the original n-Ti<sub>2</sub>SnC.



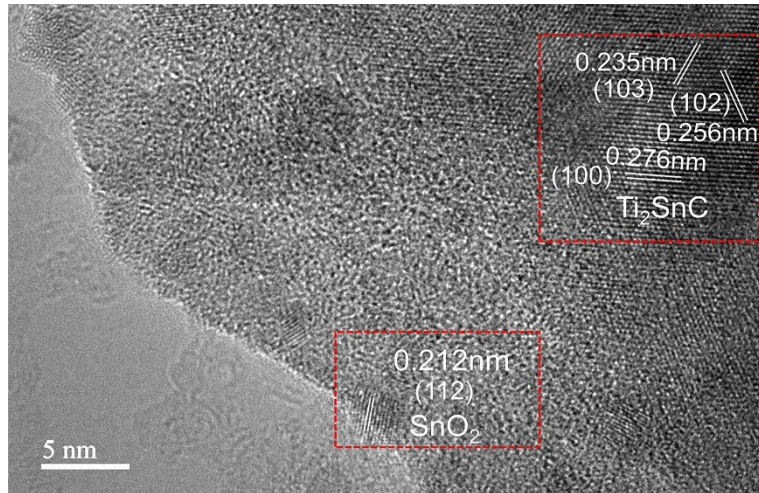

**Figure S9.** HRTEM image of n-Ti<sub>2</sub>SnC after 1000 charge/discharge cycles.

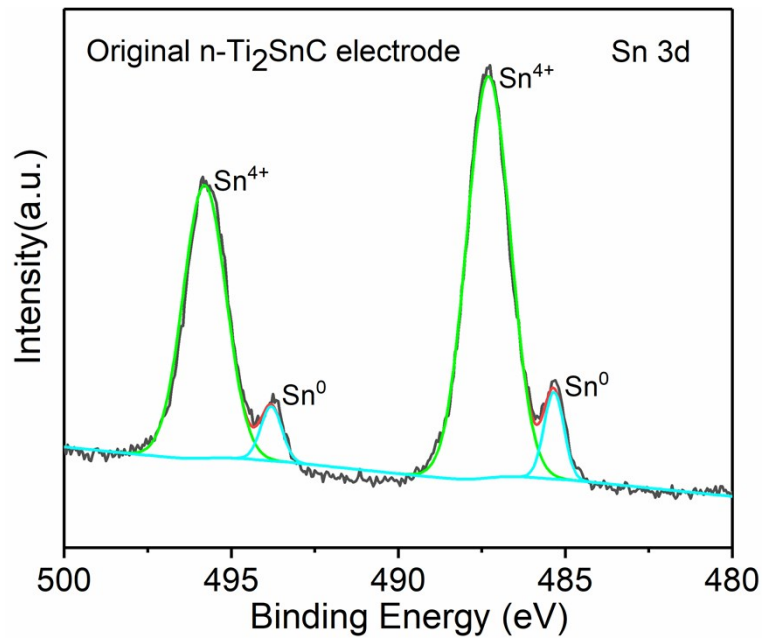

**Figure S10.** Sn 3d XPS of original n-Ti<sub>2</sub>SnC electrode.

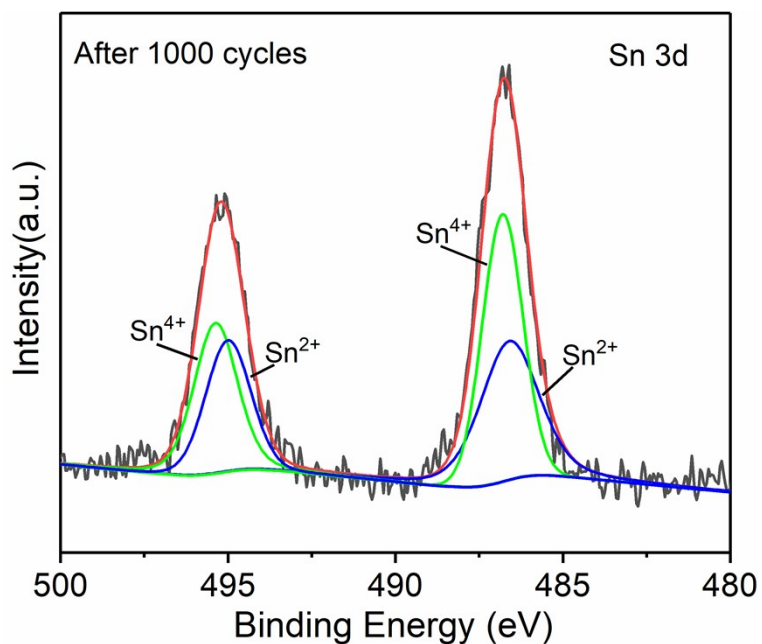

**Figure S11.** Sn 3d XPS of n-Ti<sub>2</sub>SnC electrode after 1000 charge/discharge cycles.

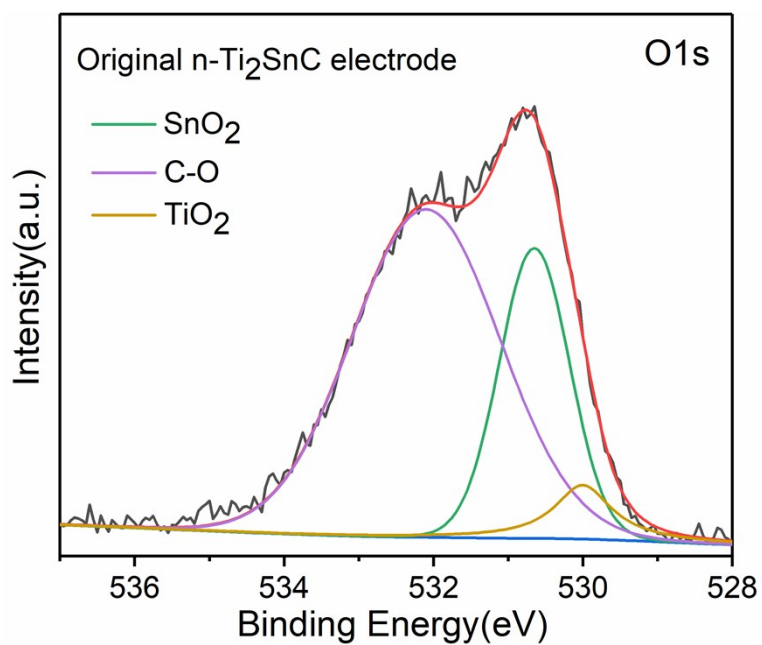

**Figure S12.** O 1s XPS of original n-Ti<sub>2</sub>SnC electrode.



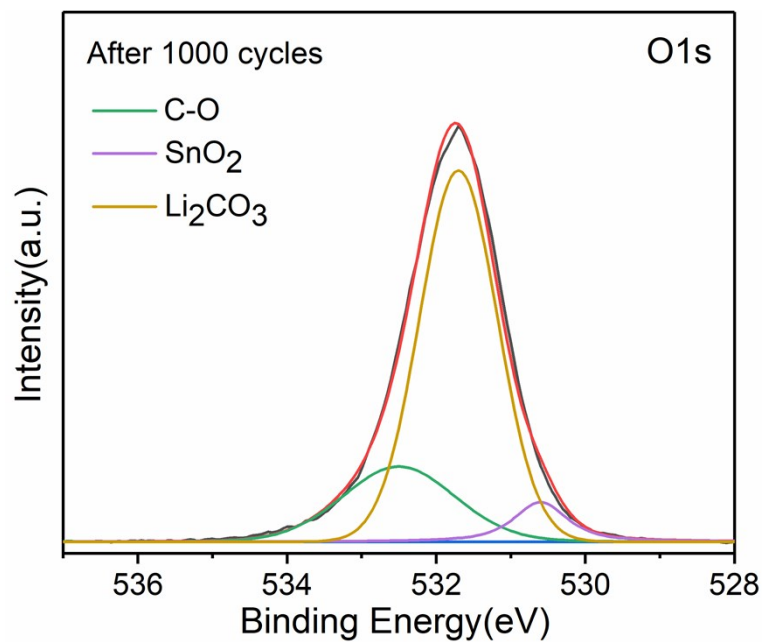

**Figure S13.** O 1s XPS of n-Ti<sub>2</sub>SnC electrode after 1000 charge/discharge cycles.
